# A central role for the notochord in vertebral patterning

Angeleen Fleming\*, Roger Keynes and David Tannahill†,‡

Department of Anatomy, University of Cambridge, Downing Street, Cambridge CB2 3DY, UK

\*Present address: DanioLabs Ltd, 7330 Cambridge Research Park, Landbeach, Cambridge CB5 9TN, UK

†Present address: The Wellcome Trust Sanger Institute, Wellcome Trust Genome Campus, Hinxton, Cambridge CB10 1SA, UK

‡Author for correspondence (e-mail: dt2@sanger.ac.uk)

Accepted 29 October 2003

Development 131, 873–880  
Published by The Company of Biologists 2004  
doi:10.1242/dev.00952

## Summary

The vertebrates are defined by their segmented vertebral column, and vertebral periodicity is thought to originate from embryonic segments, the somites. According to the widely accepted ‘resegmentation’ model, a single vertebra forms from the recombination of the anterior and posterior halves of two adjacent sclerotomes on both sides of the embryo. Although there is supporting evidence for this model in amniotes, it remains uncertain whether it applies to all vertebrates. To explore this, we have investigated vertebral patterning in the zebrafish. Surprisingly, we find that vertebral bodies (centra) arise by secretion of bone matrix from the notochord rather than somites; centra do not form via a cartilage intermediate stage, nor do they

contain osteoblasts. Moreover, isolated, cultured notochords secrete bone matrix *in vitro*, and ablation of notochord cells at segmentally reiterated positions *in vivo* prevents the formation of centra. Analysis of *fss* mutant embryos, in which sclerotome segmentation is disrupted, shows that whereas neural arch segmentation is also disrupted, centrum development proceeds normally. These findings suggest that the notochord plays a key, perhaps ancient, role in the segmental patterning of vertebrae.

Key words: Segmentation, Somites, Notochord, Vertebrae, Bone, Zebrafish

## Introduction

The segmented vertebral column is the defining feature of the vertebrates, and is composed of an alternating pattern of bony vertebral bodies (centra) and intervertebral discs. In birds and mammals, it is well known that the centra originate from the somite-derived sclerotomes, and the molecular basis for sclerotome differentiation is beginning to be elucidated. For example, sonic hedgehog (Shh) signalling (Fan et al., 1995; Fan and Tessier-Lavigne, 1994) and several transcription factors, including members of the *Pax* and *Sox* families (Akiyama et al., 2002; Balling et al., 1996; Smits and Lefebvre, 2003) and *Bapx* (Lettice et al., 1999; Tribioli and Lufkin, 1999), have been found to be required for sclerotome differentiation and proliferation (for a review, see Christ et al., 2000).

Despite these insights at the molecular level, the relationship between somite patterning and vertebral segmentation remains to be firmly established. Somites give rise to both axial muscles (from the myotome) and vertebrae (from the sclerotome) but, as Remak first observed, vertebrae are displaced by half a segment relative to muscle segments (Remak, 1850). To account for this frameshift, he proposed that a single vertebra is formed from a combination of the anterior (cranial) half of one sclerotome with the posterior (caudal) half of the next-anterior sclerotome (Remak, 1850; Verbout, 1976). Thus a single somite gives rise to a single muscle element yet contributes to two adjacent vertebrae. This ‘resegmentation’ model has been widely accepted for amniotes, both from early descriptive studies (e.g. Goodrich, 1930; Gadow, 1933) and more recent cell lineage studies (e.g. Bagnall et al., 1988; Goldstein and Kalcheim, 1992; Huang et al., 1996; Aoyama and Asamoto,

2000; Huang et al., 2000). Resegmentation has remained somewhat controversial nonetheless (Verbout, 1976; Keynes and Stern, 1988), and it has also been unclear whether the model is applicable to all vertebrates. In zebrafish, sclerotome cells constitute only a small proportion of the somite (Stickney et al., 2000) and can give rise to muscle (Morin-Kensicki and Eisen, 1997). Moreover, a recent lineage analysis in the fish has shown that cells from one half-sclerotome can contribute to two consecutive vertebrae, rather than only to one vertebra as predicted by resegmentation (Morin-Kensicki et al., 2002). This has been termed ‘leaky’ resegmentation, and is consistent with a similar finding made in a previous study using the chick embryo (Stern and Keynes, 1987).

If the classical resegmentation model does not apply in zebrafish, the question remains as to the source of segmental patterning of centra in this species. In particular, although the notochord is known to be critical for sclerotome development, its possible participation in the segmental patterning of vertebrae has been neglected, and it has generally been regarded as a passive player in this process. With this in mind, we have therefore undertaken a study of zebrafish vertebral patterning, and our results suggest that the notochord plays a central role in segmental patterning.

## Materials and methods

### Maintenance of stocks and collection of embryos

Fish were reared under standard conditions (Westerfield, 1995). Embryos were collected from natural spawnings and staged according to established criteria (Kimmel et al., 1995). *F<sub>SS</sub><sup>te314a</sup>*

mutant adults (van Eeden et al., 1996) were maintained as homozygous stocks.

### Skeletal staining

Embryos and larvae were fixed in 4% paraformaldehyde (PFA), then labelled with alcian green and alizarin red as described (Kelly and Bryden, 1983). *In vivo* labelling was achieved by rearing fish in either 0.05% quercetin or alizarin red in embryo medium. Both quercetin and alizarin red were seen to label bone matrix; quercetin was found to be most suitable because of its low toxicity, utility at physiological pH and narrow fluorescence spectrum (Simmons and Kunin, 1979).

### Antibody and alkaline phosphatase labelling

Larvae at 20 days post-fertilization (dpf), previously reared in alizarin red, were fixed in 4% PFA and stained in wholemount as described (Westerfield, 1995) with minor modifications. The zns5 monoclonal antibody (gift of Chuck Kimmel, University of Oregon, OR, USA) was used at 1:200 dilution; Alexafluor 488 (Molecular Probes, Eugene, OR) was used as a secondary antibody. Larvae were embedded in Sakura Tissue-Tek OCT Compound (Bayer, Newbury, UK) and frozen sections were cut at 10  $\mu$ m thickness and counterstained using Vectamount containing DAPI (Vector Laboratories, Peterborough, UK). Sections were viewed using a Leica TCS-NT confocal microscope. Alkaline phosphatase staining was performed using an ELF97 cytological labelling kit (E6602) as described by the manufacturer (Molecular Probes) and visualised by fluorescence microscopy on a Zeiss Axioplan 2 microscope. With a DAPI filter set, the positive signal appears green. Centra at all axial levels were examined, and representative images were taken.

### Transmission electron microscopy

Larvae at 20 dpf were fixed in 4% glutaraldehyde in cacodylate buffer containing 0.006% hydrogen peroxide for 3 hours, then washed in cacodylate buffer before post-fixing in osmium tetroxide. Samples were bulk stained with uranyl acetate, dehydrated in ethanol and embedded in Spurr's resin. Thin sections (5 nm) were prepared with a Leica Ultracut UCT, stained with uranyl acetate and lead citrate and viewed in a Philips CM100 electron microscope at 80 KV.

### Notochord dissection

Embryos at 2-6 dpf were anaesthetised in 0.2 mg/ml 3-amino benzoic acid ethylester (MS222) and then decapitated. Notochords were dissected using tungsten needles. Some were fixed immediately after dissection in 4% PFA and labelled with DAPI and/or 0.05% quercetin. Others were cultured in L-15 containing 10% FCS, 0.1% gentamycin at 32°C for 10-20 days before being labelled with quercetin and viewed using a Zeiss Axioplan 2 microscope.

### Notochord cell ablation

Embryos and larvae were anaesthetised in 0.2 mg/ml MS222, mounted on a depression slide and viewed on a Zeiss Axioplan 2 microscope with Micropoint laser system (Photonic Instruments, St. Charles, IL, USA). Individual cells were ablated with pulses of 440 nm laser light. Targeted notochord cells were located either at the myoseptal border, or at the centre of the prospective centra; individual notochord cells are large and vacuolated, with a clear boundary, and are readily distinguished. Single cells were targeted with sub-micron

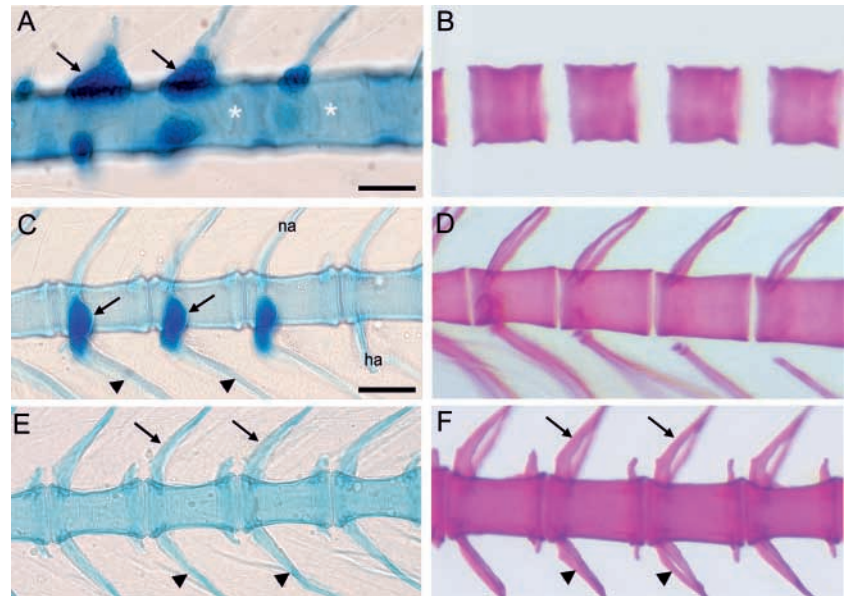

**Fig. 1.** Cartilage and bone formation in the zebrafish vertebral column. (A,C,E) Alcian green staining for cartilage. (B,D,F) Alizarin red staining for bone. (A) At 9 dpf cartilage is only found in the Weberian apparatus (arrows), a specialisation of the four most anterior vertebrae. The Weberian apparatus is described as arising from V1-5 by Morin-Kensicki et al. (Morin-Kensicki et al., 2002), although V1 and V2 give the appearance of a single vertebra in our experiments (see also Coburn and Futey, 1996). Staining is not seen in the centra (asterisks). The weak staining in the bulk of the centra is non-specific, acellular background staining, indicating an absence of chondrocytes and therefore cartilage in these regions. (B) Despite the absence of cartilage, bone is seen in cervical centra at 9 dpf. (C) Cartilage is only seen in the rib heads (arrows) and not in the centra, neural (na) or haemal (ha) arches, or distal ribs (arrowheads) at 17 dpf. (D) Ossified centra are present along the trunk by 17 dpf. (E,F) By 23 dpf, neural (arrows) and haemal (arrowheads) arches have also formed in the tail. Centra and arches ossify without forming cartilage. Scale bars: A,B, ~50  $\mu$ m; C-F, ~100  $\mu$ m.

resolution using the cross-hairs of the eyepiece (see Fig. 4C,D); targeted cells could be seen to burst, and surrounding undamaged notochord cells expanded to fill the available space. In most cases only one cell was ablated; cells outside the focal plane of the beam were not damaged because the beam energy was only sufficient to damage cells lying in the focal plane itself. Sometimes a second cell partially overlapped the targeted cell, and this was also ablated by a second laser pulse refocused on this second cell. Fish were allowed to recover and later labelled with 0.05% quercetin as described above.

### In situ hybridisation

The *Pax9* probe was a gift from E. Melancon and J. Eisen. The *Smad1* probe was a gift from A. Dick and M. Hammerschmidt. In situ hybridisation was performed as described (Westerfield, 1995) with minor modifications.

## Results

### Zebrafish bony centra do not pass through a cartilage intermediate stage

To establish the time-course of vertebral development, we employed alcian green and alizarin red to label cartilage and bone, respectively. Cartilage can first be detected in the craniofacial skeleton at ~2 dpf (data not shown), whereas the first cartilaginous elements associated with the vertebral column appear at ~7 dpf, being readily apparent at ~9 dpf (Fig.

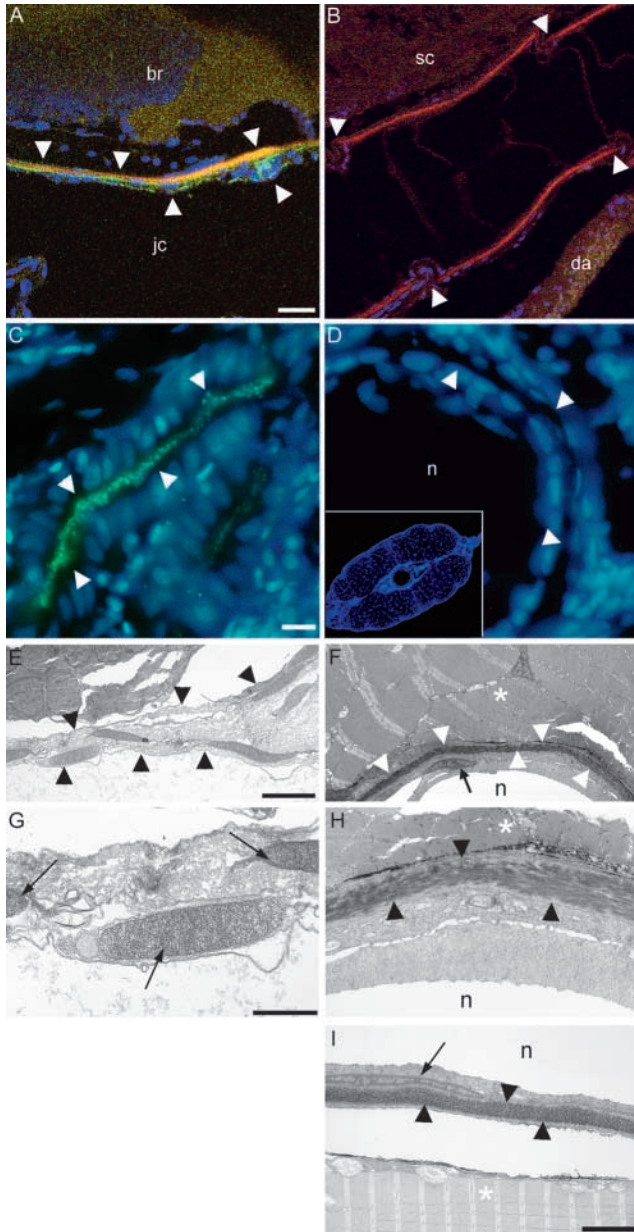

**Fig. 2.** Ossification in the zebrafish vertebral column.

(A,B) Simultaneous labelling at 20 dpf with alizarin red (red) for bone, *zns5* (green) for osteoblasts, and DAPI (blue) for nuclei. (A) Confocal microscopic image of a sagittal section through the intramembranous parasphenoid bone (arrowhead) separating the jaw cavity (jc) from the brain (br). Osteoblasts in bone matrix are indicated by co-localization of alizarin red and *zns5* (yellow). (B) Representative confocal microscopic image of a sagittal section through a thoracic centrum showing bone (red) but not *zns5* labelling, indicating the absence of osteoblasts (all centra were examined in 10 serially sectioned embryos). Arrowheads indicate centrum boundaries. da, dorsal aorta; sc, spinal cord. (C,D) Osteoblasts assessed by alkaline phosphatase activity (green) using wide-field fluorescent microscopy. DAPI (blue) labels cell nuclei. (C) Representative transverse section through the epiphyseal bar of the skull (arrowheads) at 20 dpf showing large numbers of osteoblasts. (D) Representative transverse section (20 µm) through a mid-trunk centrum at 20 dpf, with no osteoblast labelling in the notochord (n) and surrounding centrum (arrowheads); inset shows a view at ~0.1x (all centra were examined in 10 serially sectioned embryos). (E-H) Analysis of bone by transmission electron microscopy (20 dpf). (E) Intramembranous ossification in the parasphenoid bone; osteoblast nuclei are clearly seen within bone matrix (arrowheads). (F) A centrum in transverse section showing acellular ossification. Bone matrix (arrowheads) lies adjacent to muscle (asterisk), encircling the notochord (n). In all samples (15 sections, 5 embryos) no osteoblasts were found. A notochord cell nucleus (arrow) lies adjacent to the matrix on the inner surface of the centrum. (G,H) High magnification images of E and F, respectively. Cell nuclei (arrows) are conspicuous within the intramembranous bone (G) but not centrum matrix (H). The latter is electron dense and lamellated (arrowheads). (I) Centrum in sagittal section showing bone matrix (arrowheads) lacking osteoblasts; the gap between bone and muscle (asterisk) is due to shearing during processing; arrow marks a nucleus from the notochord (n). Scale bars: A,B, ~10 µm; C,D, ~5 µm; E,F, ~2 µm; G,H, ~1 µm; I, ~4 µm.

1A). This cartilage is only seen in the first four vertebrae, and forms the Weberian apparatus, a specialized structure that connects the swim bladder to the inner ear (Coburn and Futey, 1996; Morin-Kensicki et al., 2002). By 17 dpf, additional cartilaginous elements can be seen in the thoracic region, in the costal rib heads that articulate with the vertebral bodies (centra).

Strikingly, we find that centra remain devoid of cartilage in their transition to bone, with no intense staining comparable to that seen in the Weberian cartilage or the costal rib heads (Fig. 1C). Consistent with this, *coll2a1*-expressing chondrocytes are also absent from developing centra (data not shown). Ossification begins at ~7 dpf, and two days later the most anterior centra are readily distinguishable as bony cylinders surrounding the notochord (Fig. 1B). Centra are laid down in an anterior to posterior sequence (Fleming et al., 2001; Morin-Kensicki et al., 2002) and, by ~17 dpf, thoracic centra have

ossified without passing through a cartilage stage (Fig. 1D). Ossified neural and haemal arches appear from ~17 dpf (Fig. 1D), and an essentially complete column is formed by 23 dpf (Fig. 1E,F). Because a cartilage intermediate is not observed at any stage, bony centra in zebrafish do not develop by endochondral ossification, which is in marked contrast to amniotes (Dockter, 2000).

### Osteoblasts are not present in centrum bone matrix

A second mechanism of bone formation, intramembranous ossification, is recognized, where bone forms directly from mesenchymal cells that differentiate into osteoblasts, with no cartilage intermediate (Gilbert, 2000). We therefore looked for the presence of osteoblasts within the developing zebrafish centra. As a control we confirmed that *zns5* (Johnson and Weston, 1995) and alkaline phosphatase (Simmons and Kunin, 1979) label osteoblasts in developing skull bones, where intramembranous ossification takes place (Fig. 2A,C). However, no osteoblasts were seen in the developing centra using these markers (Fig. 2B,D), suggesting that bone formation in developing centra is atypical. The thick section in Fig. 2D shows several nuclei in the notochord vicinity, and these probably arise from paraxial mesoderm and/or neural tube.

In some teleosts another, unusual mechanism of ossification has been noted, where bone matrix-secreting cells remain

external to the bone so that the latter is devoid of osteocytes (Ekanayake and Hall, 1987). We therefore examined centrum ossification by electron microscopy to determine whether a similar mechanism applies to zebrafish centra. Whereas the parasphenoid bone displayed an appearance typical of intramembranous bone (Fig. 2E,G), the centrum comprised a thickened laminated matrix devoid of osteoblasts (Fig. 2F,H,I). It has been suggested that vertebral bone in another teleost, medaka, is deposited by osteoblasts lying outside the centra (Ekanayake and Hall, 1988). However, we find only muscle cells at this location in the zebrafish, implying that centrum matrix is secreted by the notochord in this species.

### The notochord is a source of bone matrix in vitro

To investigate whether the notochord is a source of bone matrix, we dissected notochords free of surrounding tissues prior to centrum formation, and cultured them in vitro for 10–20 days, by which time centrum bone would have formed in vivo. Matrix deposition was assessed by labelling with quercetin (Simmons and Kunin, 1979). In cultured notochords strong labelling for bone matrix was seen between individual cells (Fig. 3A,B). Fully developed centra were not seen, presumably reflecting diffusion of matrix in vitro when the notochord is no longer confined by the presence of surrounding tissues. To exclude the presence of residual adherent osteoblasts on the outside surface of the notochord sheath, a nuclear label was also used, and no nuclei were seen external to the notochord (Fig. 3C–E).

### The notochord is a source of bone matrix in vivo

If the notochord directs bone synthesis in vivo, laser ablation of notochord cells at defined locations might be expected to prevent centrum development. Because centrum bone deposition is initiated adjacent to the myoseptal border (Fig. 4A,B), we targeted single (or occasionally two – see Materials and methods) notochord cells at this position at a stage prior to centrum formation (Fig. 4C,D). Embryos were then reared in the presence of fluorescent compounds to label centra in vivo (Du et al., 2001). Ablated regions were seen to be invaded by neighbouring non-targeted cells (Fig. 4E), whereas surrounding tissues, such as muscle, were unaffected (Fig. 4F). It was striking that centra from ablated regions were absent, whereas those lying adjacent were normal (Fig. 4G,H). Moreover, when notochord cells in the middle of the prospective centra were ablated, centra developed normally (Fig. 4I,J).

These results confirm that the notochord directs centrum bone synthesis in vivo. Because ablation of notochord cells in defined, periodic locations was required to prevent centrum development, our results also raise the possibility that the notochord has an inherent periodicity that may impart segmental patterning to the vertebral column.

### An instructive role for the notochord in segmental patterning

According to the resegmentation hypothesis,

disrupting somite segmentation should perturb vertebral segmentation, because the reorganization of half-sclerotomes would be abnormal. However, if the notochord also plays an instructive role in segmental patterning, its presence may be sufficient to maintain segmentation following somite disruption. In *fused somites* (*fs*) embryos, somites lose their anterior-posterior polarity and their overt boundaries are irregular (van Eeden et al., 1996). In these embryos, the neural and haemal arches are highly disorganized, but centra develop nonetheless with normal shape, size and periodicity (Fig. 5A–D) (see also van Eeden et al., 1996). This observation is consistent with a primary role for the notochord in centrum segmentation.

Some features of residual segmentation are known to be retained in *fs* mutants (van Eeden et al., 1996; van Eeden et al., 1998; Durbin et al., 2000; Nikaido et al., 2002), and it was therefore important to establish whether this is the case for sclerotome segmentation. We employed in situ hybridization with the sclerotome-specific markers, *Pax9* (Nornes et al., 1996) and *Smad1* (Dick et al., 1999), to assess sclerotome patterning in these mutants, and found that the segmental organization of the sclerotome is disrupted (Fig. 5E–H). Finally, we also confirmed the requirement for the notochord in centrum formation in *fs* embryos by laser ablation of notochord cells (Fig. 5I,J). Taken together, these observations

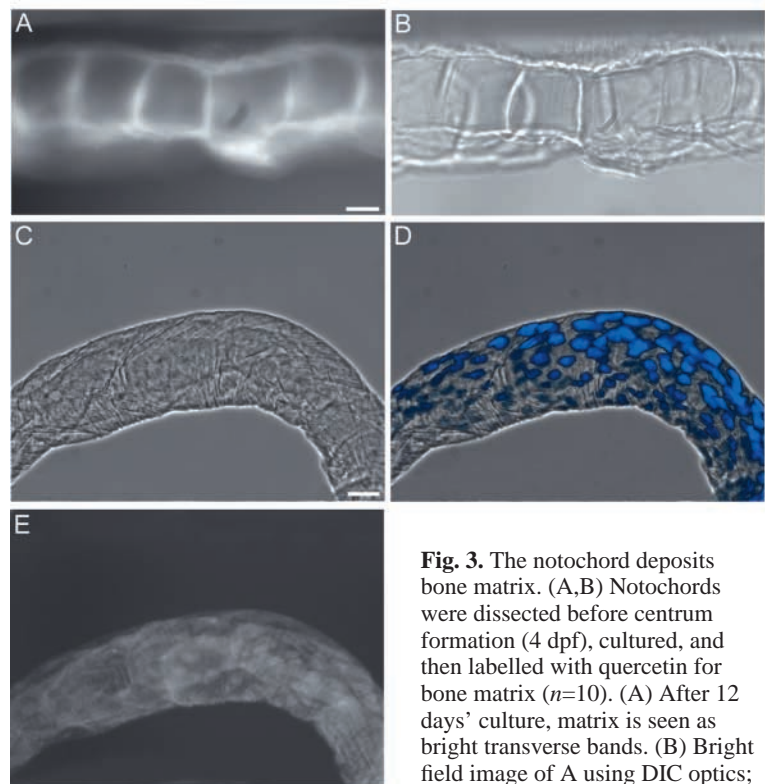

**Fig. 3.** The notochord deposits bone matrix. (A,B) Notochords were dissected before centrum formation (4 dpf), cultured, and then labelled with quercetin for bone matrix ( $n=10$ ). (A) After 12 days' culture, matrix is seen as bright transverse bands. (B) Bright field image of A using DIC optics; bone labelling is seen between cell

boundaries. (C) Phase-contrast image of a notochord dissected and fixed at 4 dpf. (D) Composite phase-contrast and DAPI image of C showing nuclei (blue) only within the boundaries of the notochord sheath (adjacent to phase-bright lines); no cells are seen outside the sheath ( $n=8$ ). (E) Notochord in C labelled with quercetin, showing no positive staining for bone matrix; the notochord is delineated by background fluorescence, and faint nuclear (DAPI) fluorescence is observed in the FITC channel. Scale bars: A,B,  $\sim 100 \mu\text{m}$ ; C–E,  $\sim 80 \mu\text{m}$ .

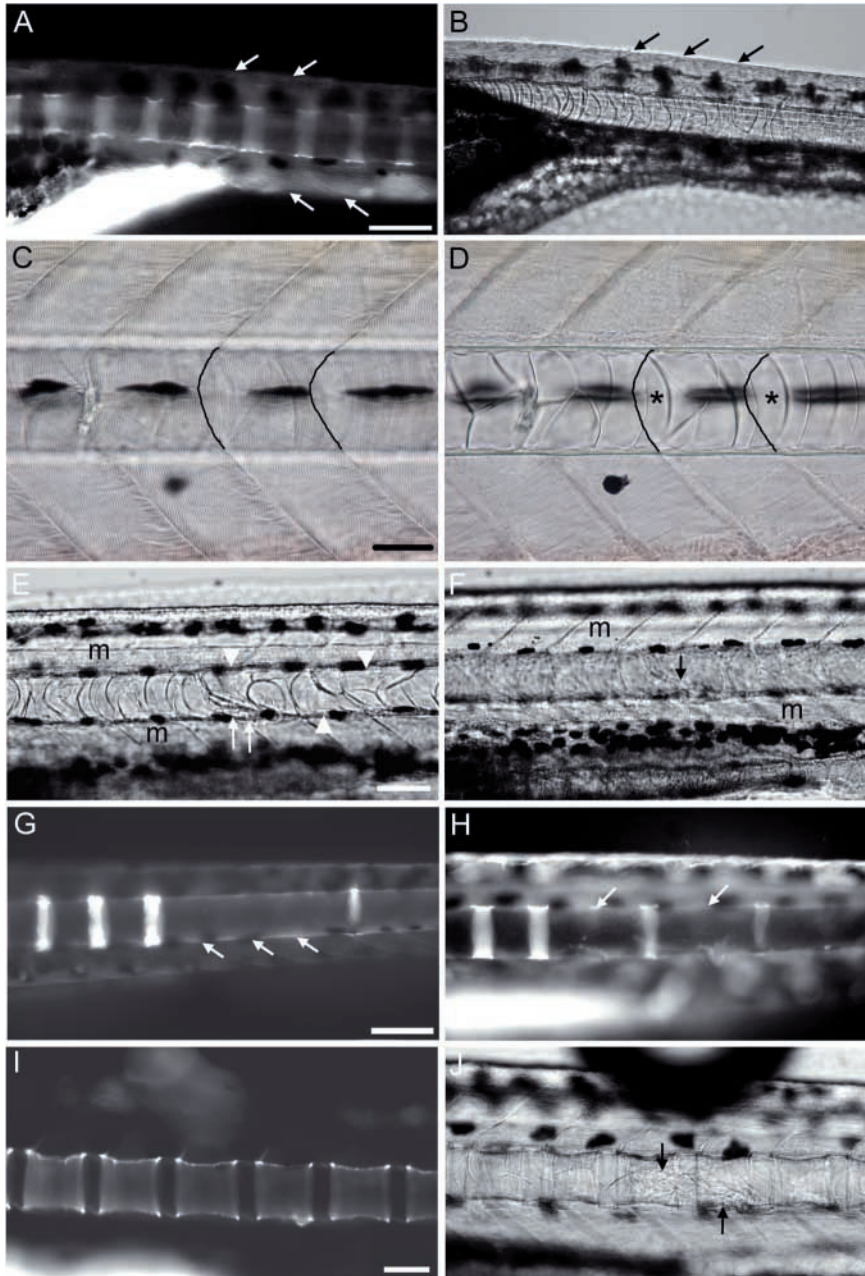

**Fig. 4.** Ablation of notochord cells prevents formation of centra. (A) Unablated embryo (12 dpf) stained with quercetin. Centra appear as stripes along the anterior-posterior axis. (B) DIC image of embryo in A; the anterior boundary of each centrum is level with each myoseptal border (arrows mark the myoseptal border cleft, anterior to left; extrapolation of the arrow vectors in A and B shows the alignment of the V-shaped myoseptal borders with the anterior edges of the developing centra). (C,D) Bright field images of a 4-dpf embryo, showing appearance of notochord cells prior to targeting with the laser. Cross hairs were aligned on the myoseptal borders at the focal plane of muscle segments (C), and the focus was then adjusted to the plane of notochord cells (D). Asterisks denote single notochord cells spanning the diameter of the notochord; these have a typically cylindrical appearance, and would be selected for ablation. The position of two myoseptal borders at the dorsoventral level of the notochord is indicated by dark lines. (E-H) Ablation of notochord cells before centrum formation (at 4 dpf) preventing subsequent development of centra. Cells were targeted at several positions along the anterior-posterior axis, each level with the myoseptal border (16 embryos). (E) DIC image of an embryo after notochord ablation showing the ablation site at 10 dpf (arrows); adjacent notochord cells have altered shape to fill the site (arrowheads). (F) Embryo in E at a focal plane above the notochord showing no damage in adjacent muscle (m); arrow indicates ablation site. (G) Targeting of three notochord cells from consecutive segments prevents development of three centra (arrows); quercetin labelling at 12 dpf. (H) Targeting of notochord cells from alternate segments prevents development of alternate centra (arrows); quercetin labelling at 12 dpf. (I,J) Ablation of notochord cells at 4 dpf in the centre of prospective centra does not affect their development (8 embryos). (I) Quercetin labelling at 20 dpf after ablation at 4 dpf. (J) DIC image of embryo in I, arrows indicate ablation sites. Scale bars: A,B, ~100  $\mu$ m; C,D, ~50  $\mu$ m; E,F, ~100  $\mu$ m; G,H, ~100  $\mu$ m; I,J, ~100  $\mu$ m.

suggest that, alongside the somites, the notochord also has a key role in imparting segmental information to the vertebral column.

## Discussion

Our studies on the development of the zebrafish vertebral column have highlighted several unexpected features. First, although some sclerotome cells are known to contribute to vertebrae (Morin-Kensicki et al., 2002) (see below), we have found that the notochord secretes centrum bone matrix. Whether this is a more general mechanism for centrum formation in all vertebrates remains to be determined.

A previous morphological investigation of vertebral development in another teleost, medaka, has shown that bone

matrix in this species is secreted by a layer of osteocytes that lie over the outer surface of the centrum, with no deposition on the inner surface (Ekanayake and Hall, 1987; Ekanayake and Hall, 1988). Matrix-producing cells avoid becoming trapped in their own secretion because of its polarized nature, where cells only generate matrix in the direction of previously deposited bone. We have found that zebrafish centra also lack osteoblasts embedded in the bone matrix, but the secretion process resembles an inverted version of that in medaka; matrix is deposited from inside the bony ring, by notochord cells, rather than from outside.

Such a mechanism raises the intriguing problem of how zebrafish centra increase in size during later development. One possibility is that the sclerotome-derived osteoblasts invade the centra at a later developmental stage. In keeping with this, the

presence of some sclerotome cells has recently been noted in the developing zebrafish vertebra, particularly in the neural arches, showing that sclerotome cells can contribute vertebral bone (Morin-Kensicki et al., 2002). The relative contribution of sclerotome cells to centra is less clear, however, and requires further investigation.

### A duality in vertebral patterning

Our results also suggest that the notochord may make an important contribution to the segmental patterning of the vertebral column. In particular, we find that segmentation is lost after ablation in vivo of notochord cells lying at precise, segmentally reiterated positions along the developing trunk, adjacent to the somite boundaries. This suggests that notochord

cells adjacent to boundaries initiate centrum formation; subsequent expansion of the centrum may result from diffusion of this matrix along the long axis, and/or an additional contribution of matrix from neighbouring notochord cells at later stages.

In *fs* mutant embryos, where sclerotome patterning is abnormal, the subsequent patterning of the neural and haemal arches is also disorganized, yet the centra develop normally. In combination with the ablation studies, these findings suggest the existence of a duality in vertebral patterning, in which the notochord and somites impart complementary segmental information to the vertebral column. The notochord is necessary to generate the metameric arrangement of centra, whereas the somites direct patterning of the arch elements attached to them. It is interesting to note here that, like the centra, the arches also develop in the absence of a cartilage intermediate, implying that sclerotome-derived chondrocytes are also absent in this vertebral region. Although it is possible that residual manifestations of trunk segmentation may remain in *fs* mutant embryos (van Eeden et al., 1998), our use of these embryos to test the resegmentation hypothesis is appropriate. The key feature of this model is the

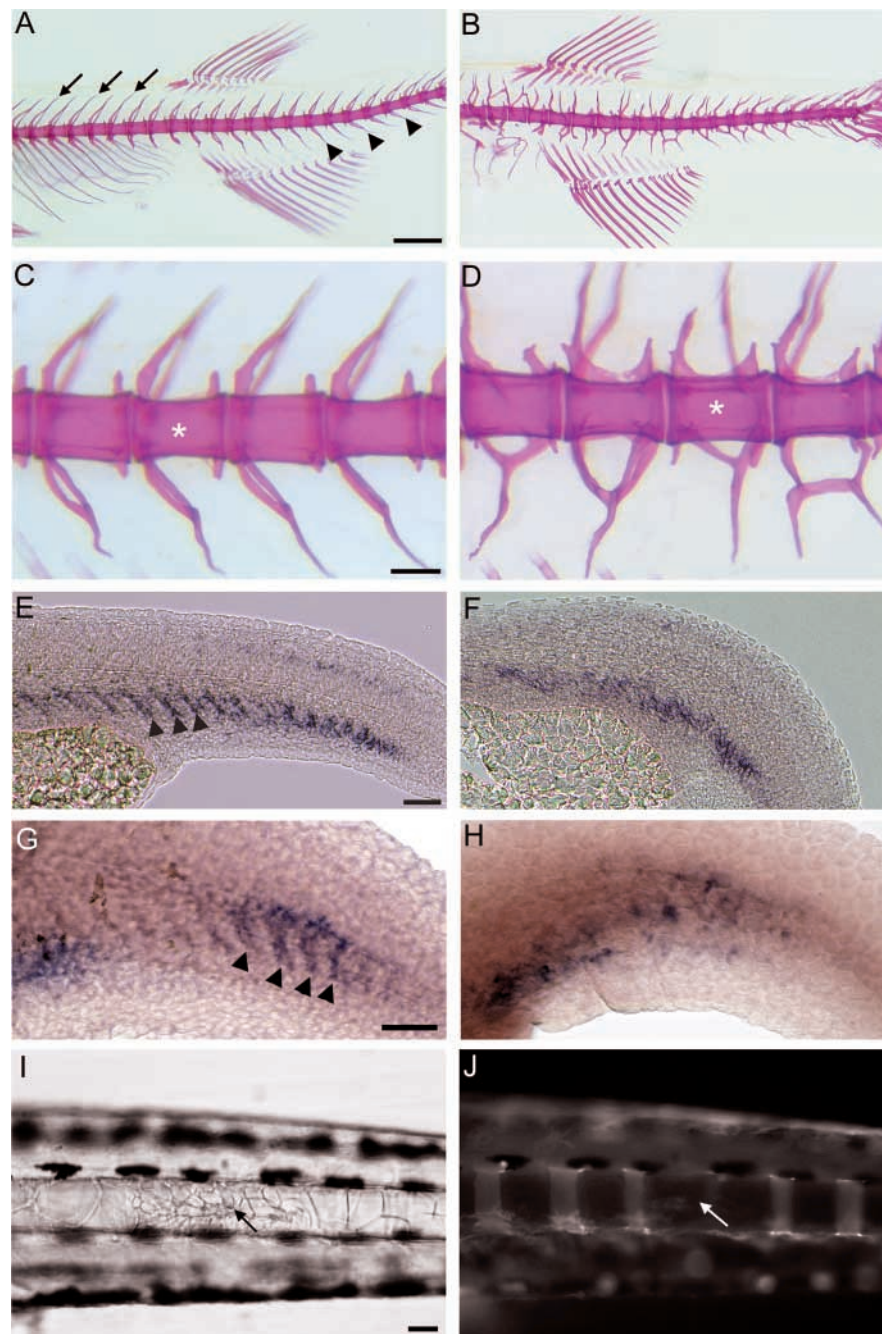

**Fig. 5.** Vertebral segmentation in *fused somite* (*fs*) mutant fish. (A–D) Alizarin red staining of 30 dpf larvae. (A) In wild-type larvae, neural (arrows) and haemal (arrowheads) arches extend from each centrum in a regular manner. (B) As reported previously (van Eeden et al., 1996), defects in the position and projection of the neural and haemal arches are conspicuous in *fs* embryos. (C,D) Higher magnification of A and B, respectively. In wild-type (C) and *fs* (D) embryos, centra (asterisk) are of uniform size and no fusions or abnormalities are seen in *fs* centra. (E,F) *Pax9* expression in sclerotome of wild-type and mutant embryos at 24 hours post-fertilization (hpf). (E) Wild-type expression in discrete cell clusters, one cluster per somite (arrowheads). (F) In *fs* mutants, expression is not segmented. (G,H) *Smad1* expression in sclerotome of wild-type and *fs* embryos at 36 hpf. (G) Similar to *Pax9*, *Smad1* expression is seen in one cell cluster per somite (arrowheads). (H) In *fs* mutants the segmented pattern of *Smad1* expression is disrupted. (I,J) Ablation of notochord cells (arrow) in 4-dpf *fs* embryos prevents development of centra (8 embryos). (I) DIC image of 12-dpf embryo indicating wound site and local cell reorganization resulting from ablation (arrow). (J) Bone staining of embryo in I showing absence of centrum (arrow indicates the probable anterior centrum boundary) after ablation. Scale bars: A,B, ~500  $\mu$ m; C,D, ~100  $\mu$ m; E,F, ~20  $\mu$ m; G,H, ~20  $\mu$ m; I,J, ~100  $\mu$ m.

subdivision of the sclerotome into anterior and posterior halves, with a subsequent recombination of adjacent halves; the finding that the segmental organization of the sclerotome is destroyed in *fs*s mutants, yet centra are normal, presents a major difficulty for any simple version of this model.

A further difficulty in applying classical resegmentation in the zebrafish comes from a recent lineage study testing the hypothesis directly. Clonal analysis of the zebrafish sclerotome has shown that cells from one half-sclerotome can contribute to two adjacent vertebrae. There is, therefore, no tight correlation between sclerotome fate and vertebral origins in the zebrafish (Morin-Kensicki et al., 2002), and a similar finding has been reported previously using quail-to-chick half-somite grafts (Stern and Keynes, 1987). Morin-Kensicki et al. have proposed a 'leaky' resegmentation model, based on a continuing primacy for the sclerotome in vertebral patterning. This modified model does predict the extensive vertebral arch defects seen in *fs*s mutants, but has greater difficulty in explaining the normal appearance of centra in these mutants. An alternative view, supported by the findings of this study, is that the notochord plays a central and instructive role in centrum segmentation.

### Notochord segmentation

Our results suggest that the notochord is functionally segmented, raising the question of whether it is also segmented at the molecular level. To date, no periodic patterns of gene expression have been described in the early notochord, but these may exist nonetheless. Regionally restricted patterns of *Hox* gene expression have been described in the zebrafish notochord (Prince et al., 1998), suggesting that this morphologically uniform structure is at least subdivided regionally along the anterior-posterior axis. Further evidence for regional subdivision is provided by the observation that the anterior notochord in *Xenopus* is a more powerful inducer of *En-2* in neural ectoderm than posterior notochord (Hemmati-Brivanlou et al., 1990); the regional inducing capacity of the early chordamesoderm is also well known (Spemann, 1938).

If the notochord has an instructive role in segmental patterning, the question arises as to how this is acquired. Segmentation of both notochord and somite mesoderm may originate simultaneously during gastrulation. Alternatively, notochord segmentation may be secondary to somite segmentation, being transmitted by unknown mechanisms between these adjacent tissues.

Overall, our results support the view that the notochord is an archetypal segmental structure in the vertebrate trunk (Stern, 1990; Fleming et al., 2001). Consistent with this view, extirpation of the notochord in amphibian and avian embryos results in the formation of a rod of vertebral cartilage lacking overt segmental features (Kitchin, 1949; Strudel, 1955). This raises the intriguing possibility that the notochord has a conserved role in the instruction of vertebral patterning in all vertebrate classes.

This work was supported by the BBSRC and the Royal Society. We thank the Harris Laboratory for help with the fish facility, Chuck Kimmel and Bonnie Ullmann for invaluable advice, Janet Powell and Jeremy Skepper for help with microscopy, and the Audio Visual Media Group.

## References

- Akiyama, H., Chaboissier, M. C., Martin, J. F., Schedl, A. and de Crombrughe, B. (2002). The transcription factor Sox9 has essential roles in successive steps of the chondrocyte differentiation pathway and is required for expression of Sox5 and Sox6. *Genes Dev.* **16**, 2813-2828.
- Aoyama, H. and Asamoto K. (2000). The developmental fate of the rostral/caudal half of a somite for vertebra and rib formation: experimental confirmation of the resegmentation theory using chick-quail chimeras. *Mech. Dev.* **99**, 71-82.
- Bagnall, K. M., Higgins, S. J. and Sanders, E. J. (1988). The contribution made by a single somite to the vertebral column: experimental evidence in support of resegmentation using the chick-quail chimaera model. *Development* **103**, 69-85.
- Balling, R., Neubüser, A. and Christ, B. (1996). Pax genes and sclerotome development. *Semin. Cell Dev. Biol.* **7**, 129-136.
- Christ, B., Huang, R. and Wilting, J. (2000). The development of the avian vertebral column. *Anat. Embryol. (Berl.)* **202**, 179-194.
- Coburn, M. T. and Futey, L. M. (1996). The ontogeny of supraneural and neural arches in the cypriniform Weberian Apparatus (Teleostei: Ostariophysi). *Zoological Journal of the Linnean Society* **116**, 333-346.
- Dick, A., Meier, A. and Hammerschmidt, M. (1999). Smad1 and Smad5 have distinct roles during dorsoventral patterning of the zebrafish embryo. *Dev. Dyn.* **216**, 285-298.
- Doekter, J. L. (2000). Sclerotome induction and differentiation. *Curr. Top. Dev. Biol.* **48**, 77-127.
- Du, S. J., Frenkel, V., Kindschi, G. and Zohar, Y. (2001). Visualizing normal and defective bone development in zebrafish embryos using the fluorescent chromophore calcein. *Dev. Biol.* **238**, 239-246.
- Durbin, L., Sordino, P., Barrios, A., Gering, M., Thisse, C., Thisse, B., Brennan, C., Green, A., Wilson, S. and Holder, N. (2000). Anteroposterior patterning is required within segments for somite boundary formation in developing zebrafish. *Development* **127**, 1703-1713.
- Ekanayake, S. and Hall, B. K. (1987). The development of acellularity of the vertebral bone of the Japanese medaka, *Oryzias latipes* (Teleostei; Cyprinodontidae). *J. Morphol.* **193**, 253-261.
- Ekanayake, S. and Hall, B. K. (1988). Ultrastructure of the osteogenesis of acellular vertebral bone in the Japanese medaka, *Oryzias latipes* (Teleostei, Cyprinodontidae). *Am. J. Anat.* **182**, 241-249.
- Fan, C. M. and Tessier-Lavigne, M. (1994). Patterning of mammalian somites by surface ectoderm and notochord: evidence for sclerotome induction by a hedgehog homolog. *Cell* **79**, 1175-1186.
- Fan, C. M., Porter, J. A., Chiang, C., Chang, D. T., Beachy, P. A. and Tessier-Lavigne, M. (1995). Long-range sclerotome induction by sonic hedgehog: direct role of the amino-terminal cleavage product and modulation by the cyclic AMP signaling pathway. *Cell* **81**, 457-465.
- Fleming, A., Keynes, R. J. and Tannahill, D. (2001). The role of the notochord in vertebral column formation. *J. Anat.* **199**, 177-180.
- Gadow, H. (1933). *The Evolution of the Vertebral Column*. Cambridge: Cambridge University Press.
- Gilbert, S. F. (2000). *Developmental Biology*. Sunderland, MA: Sinauer Associates.
- Goldstein, R. S. and Kalcheim, C. (1992). Determination of epithelial half-somites in skeletal morphogenesis. *Development* **116**, 441-445.
- Goodrich, E. S. (1930). *Studies on the Structure and Development of Vertebrates*. London: MacMillan.
- Hemmati-Brivanlou, A., Stewart, R. M. and Harland, R. M. (1990). Region-specific neural induction of an engrailed protein by anterior notochord in *Xenopus*. *Science* **250**, 800-802.
- Huang, R., Zhi, Q., Brand-Saberi, B. and Christ, B. (2000). New experimental evidence for somite resegmentation. *Anat. Embryol. (Berl.)* **202**, 195-200.
- Huang, R., Zhi, Q., Neubuser, A., Muller, T. S., Brand-Saberi, B., Christ, B. and Wilting, J. (1996). Function of somite and somitocoele cells in the formation of the vertebral motion segment in avian embryos. *Acta. Anat.* **155**, 231-241.
- Johnson, S. L. and Weston, J. A. (1995). Temperature-sensitive mutations that cause stage-specific defects in Zebrafish fin regeneration. *Genetics* **141**, 1583-1595.
- Kelly, W. L. and Bryden, M. M. (1983). A modified differential stain for cartilage and bone in whole mount preparations of mammalian fetuses and small vertebrates. *Stain Technol.* **58**, 131-134.
- Keynes, R. J. and Stern, C. D. (1988). Mechanisms of vertebrate segmentation. *Development* **103**, 413-429.
- Kimmel, C. B., Ballard, W. W., Kimmel, S. R., Ullmann, B. and Schilling,

- T. F. (1995). Stages of embryonic development of the zebrafish. *Dev. Dyn.* **203**, 253-310.
- Kitchin, I. C. (1949). The effects of notochordectomy in *Amblystoma mexicanum*. *J. Exp. Zool.* **112**, 393-415.
- Lettice, L. A., Purdie, L. A., Carlson, G. J., Kilanowski, F., Dorin, J. and Hill, R. E. (1999). The mouse *bagpipe* gene controls development of axial skeleton, skull, and spleen. *Proc. Natl. Acad. Sci. USA.* **96**, 9695-9700.
- Morin-Kensicki, E. M. and Eisen, J. S. (1997). Sclerotome development and peripheral nervous system segmentation in embryonic zebrafish. *Development* **124**, 159-167.
- Morin-Kensicki, E. M., Melancon, E. and Eisen, J. S. (2002). Segmental relationship between somites and vertebral column in zebrafish. *Development* **129**, 3851-3860.
- Nikaido, M., Kawakami, A., Sawada, A., Furutani-Seiki, M., Takeda, H. and Araki, K. (2002). Tbx24, encoding a T-box protein, is mutated in the zebrafish somite-segmentation mutant fused somites. *Nat. Genet.* **31**, 195-199.
- Nornes, S., Mikkola, I., Krauss, S., Delghandi, M., Perander, M. and Johansen, T. (1996). Zebrafish Pax9 encodes two proteins with distinct C-terminal transactivating domains of different potency negatively regulated by adjacent N-terminal sequences. *J. Biol. Chem.* **271**, 26914-26923.
- Prince, V. E., Price, A. L. and Ho, R. K. (1998). Hox gene expression reveals regionalization along the anteroposterior axis of the zebrafish notochord. *Dev. Genes Evol.* **208**, 517-522.
- Remak, R. (1850). *Untersuchungen über die Entwicklung der Wirbeltiere*. Berlin: Reimer.
- Simmons, D. J. and Kunin, A. S. (1979). *Skeletal Research: An Experimental Approach*. London: Academic Press.
- Smits, P. and Lefebvre, V. (2003). Sox5 and Sox6 are required for notochord extracellular matrix sheath formation, notochord cell survival and development of the nucleus pulposus of intervertebral discs. *Development* **130**, 1135-1148.
- Spemann, H. (1938). *Embryonic Development and Induction*. New York: Hafner.
- Stern, C. D. (1990). Two distinct mechanisms for segmentation? *Semin. Dev. Biol.* **1**, 109-116.
- Stern, C. D. and Keynes, R. J. (1987). Interactions between somite cells: the formation and maintenance of segment boundaries in the chick embryo. *Development* **99**, 261-272.
- Stickney, H. L., Barresi, M. J. and Devoto, S. H. (2000). Somite development in zebrafish. *Dev. Dyn.* **219**, 287-303.
- Strudel, G. (1955). L'action morphogène du tube nerveux et de la corde sur la différenciation des vertèbres et des muscles vertébraux chez l'embryon de poulet. *Arch. d'Anat. Microsc. Morphol. Exp.* **44**, 209-235.
- Tribioli, C. and Lufkin, T. (1999). The murine bapx1 homeobox gene plays a critical role in embryonic development of the axial skeleton and spleen. *Development* **126**, 5699-5711.
- van Eeden, F. J., Granato, M., Schach, U., Brand, M., Furutani-Seiki, M., Haffter, P., Hammerschmidt, M., Heisenberg, C. P., Jiang, Y. J., Kane, D. A. et al. (1996). Mutations affecting somite formation and patterning in the zebrafish, *Danio rerio*. *Development* **123**, 153-164.
- van Eeden, F. J., Holley, S. A., Haffter, P. and Nusslein-Volhard, C. (1998). Zebrafish segmentation and pair-rule patterning. *Dev. Genet.* **23**, 65-76.
- Verbout, A. J. (1976). A critical review of the 'neugliederung' concept in relation to the development of the vertebral column. *Acta. Biotheor.* **25**, 219-258.
- Westerfield, M. (1995). *The Zebrafish Book*. Eugene, OR: University of Oregon Press.
